# Supplementary material for: Presence of autoantibodies in “seronegative” rheumatoid arthritis associates with classical risk factors and high disease activity
Source: PubMed Central journal article supplement (PMC7364538; doi:10.1186/s13075-020-02191-2), 2020-07-16
Supplement: 13075_2020_2191_MOESM1_ESM.pdf [file 13075_2020_2191_MOESM1_ESM.pdf]

**Supplementary table 1**

Citrullinated peptide antigens on the multiplex microarray

| <b>Antigen</b>                       | <b>Protein</b>      | <b>(amino acids) Amino acid sequence</b>                                                               | <b>References</b> |
|--------------------------------------|---------------------|--------------------------------------------------------------------------------------------------------|-------------------|
| Cit-peptide 1                        | hnRNP-A3            | pending patent application                                                                             | *                 |
| Cit-peptide 5                        | hnRNP-A3            | pending patent application                                                                             | *                 |
| Cit-peptide Bla26                    | hnRNP-A3            | pending patent application                                                                             | *                 |
| Cit-peptide Z1                       | hnRNP-A3            | pending patent application                                                                             | *                 |
| Cit-peptide Z2                       | hnRNP-A3            | pending patent application                                                                             | *                 |
| Cit-C1                               | CII                 | (355-378) (GPO) <sub>5</sub> -GLOGA <b>CIT</b> GLTG <b>CIT</b> OGDAGPQGKVGPS-(GPO) <sub>2</sub> -GKKYG | 1                 |
| Cit-F4 <sub>(Cit-Cit)</sub>          | CII                 | (916-939) (GPO) <sub>5</sub> -GDKGEAGEOGE <b>CIT</b> GLKGH <b>CIT</b> GFTGLQ-(GPO) <sub>2</sub> -GKKYG | 2                 |
| Cit-F4 <sub>(Cit-R)</sub>            | CII                 | (916-939) (GPO) <sub>5</sub> -GDKGEAGEOGE <b>CIT</b> GLKGHRGFTGLQ-(GPO) <sub>2</sub> -GKKYG            | 2                 |
| Cit-F4 <sub>(R-Cit)</sub>            | CII                 | (916-939) (GPO) <sub>5</sub> -GDKGEAGEOGERGLKGH <b>CIT</b> GFTGLQ-(GPO) <sub>2</sub> -GKKYG            | 2                 |
| CEP-1                                | $\alpha$ -enolase   | (5-21) C-KIHAC <b>CITE</b> IFD <b>SCIT</b> GNPTVE-C                                                    | 3                 |
| Cit-Fib $\alpha$ <sub>36-50</sub>    | fibrinogen $\alpha$ | (36-50) GPC <b>CIT</b> VVE <b>CIT</b> HQSACKDS                                                         | 4-6               |
| Cit-Fib $\alpha$ <sub>563-583</sub>  | fibrinogen $\alpha$ | (563-583) HHPGIAEFPS <b>CIT</b> GKSSSYSKQF                                                             | 7, 8              |
| Cit-Fib $\alpha$ <sub>580-600</sub>  | fibrinogen $\alpha$ | (580-600) SKQFTSSTSYNC <b>CIT</b> GDSTFESKS                                                            | 8, 9              |
| Cit-Fib- $\alpha$ <sub>621-635</sub> | fibrinogen $\alpha$ | (621-635) <b>CIT</b> GHAKS <b>CIT</b> PV <b>CIT</b> GIHTS                                              | 4-6               |
| Cit-Fib $\beta$ <sub>36-52</sub>     | fibrinogen $\beta$  | (36-52) NEEGFFSA <b>CIT</b> GHRPLDKK                                                                   | 10                |
| Cit-Fib $\beta$ <sub>60-74</sub>     | fibrinogen $\beta$  | (60-74) <b>CIT</b> PAPPISGGGY <b>CIT</b> <b>CIT</b>                                                    | 4-6               |
| cfc1-cyc (CCP1)                      | filaggrin           | (304-324) HQCHQEST <b>CIT</b> GRSRGRCGRSGS                                                             | 11                |
| Cit-Vim <sub>2-17</sub>              | vimentin            | (2-17) <b>STCIT</b> SVSSSSY <b>CIT</b> <b>CIT</b> MFGG                                                 | 12                |
| Cit-Vim <sub>60-75</sub>             | vimentin            | (60-75) VYAT <b>CIT</b> SSAV <b>CIT</b> LC <b>CIT</b> SSVP                                             | 10                |

\* Karl Skriner, Department of Rheumatology and Clinical Immunology, Charité University, Berlin, Germany

CII = collagen type II; Cit/CIT = citrullinated/citrulline; hnRNP-A3 = heterogeneous nuclear ribonucleoprotein A3

## REFERENCES (supplementary table 1)

1. Burkhardt H, Sehnert B, Bockermann R, Engström A, Kalden JR, Holmdahl R. Humoral immune response to citrullinated collagen type II determinants in early rheumatoid arthritis. *Eur J Immunol* 2005, May;35(5):1643-52.
2. Haag S, Schneider N, Mason DE, Tuncel J, Andersson IE, Peters EC et al. Identification of new citrulline-specific autoantibodies, which bind to human arthritic cartilage, by mass spectrometric analysis of citrullinated type II collagen. *Arthritis Rheumatol* 2014, Jun;66(6):1440-9.
3. Lundberg K, Kinloch A, Fisher BA, Wegner N, Wait R, Charles P et al. Antibodies to citrullinated alpha-enolase peptide 1 are specific for rheumatoid arthritis and cross-react with bacterial enolase. *Arthritis Rheum* 2008, 58:3009-3019.
4. Sebbag M, Moinard N, Auger I, Clavel C, Arnaud J, Nogueira L et al. Epitopes of human fibrin recognized by the rheumatoid arthritis-specific autoantibodies to citrullinated proteins. *Eur J Immunol* 2006, 36:2250-2263.
5. Iobagiu C, Magyar A, Nogueira L, Carnillet M, Sebbag M, Arnaud J et al. The antigen specificity of the rheumatoid arthritis-associated ACPA directed to citrullinated fibrin is very closely restricted. *J Autoimmun* 2011, 37:263-272.
6. Cornillet M, Sebbag M, Verrouil E, Magyar A, Babos F, Ruysse-Witrand A et al. The fibrin-derived citrullinated peptide  $\beta$ 60-74Cit<sub>60,72,74</sub> bears the major ACPA epitope recognised by the Rheumatoid Arthritis-specific anti-citrullinated fibrinogen autoantibodies and anti-CCP2 antibodies. *Ann Rheum Dis* 73:1246-52, 2014.
7. Hermansson M, Artemenko K, Ossipova E, Eriksson H, Lengqvist J, Makrygiannakis D et al. MS analysis of rheumatoid arthritic synovial tissue identifies specific citrullination sites on fibrinogen. *Proteom Clin Appl* 2010, 4:511-518
8. Too CL, Murad S, Hansson M, Alm LM, Dhaliwal JS, Holmdahl R et al. Spectrum of Anti Citrullinated Peptide Antibodies (ACPA) fine specificities is different between Malaysian and Swedish rheumatoid arthritis patients: Implications for pathogenesis of RA. *Arthritis Rheumatol* 2016, Epub 2016/08/03

9. Hansson M, Mathsson L, Schleder T, Israelsson L, Matsson P, Nogueira L et al. Validation of a multiplex chip-based assay for the detection of autoantibodies against citrullinated peptides. *Arthritis Res Ther* 2012, Oct 1;14(5):R201.
10. Verpoort KN, Cheung K, Ioan-Facsinay A, van der Helm-van Mil AH, de Vries-Bouwstra JK, Allaart CF et al. Fine specificity of the anti-citrullinated protein antibody response is influenced by the shared epitope alleles. *Arthritis Rheum* 2007, 56:3949-3952.
11. Schellekens GA, Visser H, de Jong BA, van den Hoogen FH, Hazes JM, Breeveld FC et al. The diagnostic properties of rheumatoid arthritis antibodies recognizing a cyclic citrullinated peptide. *Arthritis Rheum* 2000, 43:155-163.
12. Snir O, Widhe M, Hermansson M, von Spee C, Lindberg J, Hensen S et al. Antibodies to several citrullinated antigens are enriched in the joints of rheumatoid arthritis patients. *Arthritis Rheum* 2010, 62:44-52.
