# Supplementary material for: Presence of autoantibodies in “seronegative” rheumatoid arthritis associates with classical risk factors and high disease activity
Source: PubMed Central journal article supplement (PMC7364538; doi:10.1186/s13075-020-02191-2), 2020-07-16
Supplement: 13075_2020_2191_MOESM3_ESM.pdf [file 13075_2020_2191_MOESM3_ESM.pdf]

**Supplementary table 3** Baseline characteristics in anti-CCP2-positive and -negative RA

| Characteristics                                                       | CCP2+            | CCP2-            | P-value           |
|-----------------------------------------------------------------------|------------------|------------------|-------------------|
| <b>Age, median years (range)</b><br>(N: 1,766 CCP2+ / 989 CCP2-)      | 54 (18-70)       | 57 (18-70)       | <b>&lt;0.0001</b> |
| <b>Female, n (%)</b><br>(N: 1,762 CCP2+ / 984 CCP2-)                  | 1,261 (72)       | 701 (71)         | 0.9               |
| <b>Ever Smoker<sup>a</sup>, n (%)</b><br>(N: 1,385 CCP2+ / 813 CCP2-) | 1007 (72.7)      | 508 (62.5)       | <b>&lt;0.0001</b> |
| <b>HLA-DRB1 SE, n (%)</b><br>(N: 1,385 CCP2+ / 813 CCP2-)             | 1,180 (85.2)     | 441 (54.2)       | <b>&lt;0.0001</b> |
| <b>PTPN22, n (%)</b><br>(N: 1,385 CCP2+ / 813 CCP2-)                  | 427 (30.8)       | 222 (27.3)       | <b>0.02</b>       |
| <b>DAS28, median (range)</b><br>(N: 1,282 CCP2+ / 704 CCP2-)          | 5.11 (0.03-8.89) | 5.21 (0.03-8.37) | 0.053             |
| <b>CRP, median mg/L (range)</b><br>(N: 1,357 CCP2+ / 739 CCP2-)       | 12 (0-332)       | 11 (0-221)       | 0.208             |

<sup>a</sup> Ever smoker includes current and former smokers. Significant P-values are shown in bold.

CCP = cyclic citrullinated peptide; CRP = C-reactive protein; DAS28 = disease activity score using 28 joint counts; HLA = human leukocyte antigen; PTPN22 = protein tyrosine phosphatase non-receptor type 22; SE = shared epitope.
