# Supplementary material for: Presence of autoantibodies in “seronegative” rheumatoid arthritis associates with classical risk factors and high disease activity
Source: PubMed Central journal article supplement (PMC7364538; doi:10.1186/s13075-020-02191-2), 2020-07-16
Supplement: 13075_2020_2191_MOESM5_ESM.pdf [file 13075_2020_2191_MOESM5_ESM.pdf]

**Supplementary Table 4** Other autoantibodies in anti-CCP2-positive and -negative RA and controls

| Antigen     | Antibody frequencies (%) <sup>a</sup> |            |          |                      | Antibody levels (median) |        |                      |
|-------------|---------------------------------------|------------|----------|----------------------|--------------------------|--------|----------------------|
|             | CCP2+                                 | CCP2-      | controls | P-value <sup>b</sup> | CCP2+                    | CCP2-  | P-value <sup>c</sup> |
| Ro60/SSA    | <b>4.8</b>                            | <b>5.3</b> | 1.6      | 0.61                 | 419.0                    | 712.8  | <b>0.003</b>         |
| Ro52/SSA    | <b>3.4</b>                            | <b>5.3</b> | 1.4      | <b>0.02</b>          | 1252.8                   | 1320.4 | <b>0.073</b>         |
| PMScl100    | 3.1                                   | <b>4.9</b> | 2.2      | <b>0.02</b>          | 156.8                    | 154.1  | 0.471                |
| dsDNA       | 2.8                                   | 3.9        | 1.9      | 0.99                 | 25.5                     | 25.4   | 0.886                |
| La/SSB      | <b>3.1</b>                            | 2.7        | 1.1      | 0.63                 | 232.6                    | 381.2  | 0.045                |
| U1 RNP-C    | 2.1                                   | <b>3.6</b> | 1.6      | <b>0.02</b>          | 107.2                    | 147.2  | <b>0.008</b>         |
| Fibrillarin | 3.1                                   | 1.8        | 1.6      | <b>0.04</b>          | 29.0                     | 33.2   | 0.838                |
| CENPB       | <b>2.1</b>                            | 2.0        | 0.5      | 0.90                 | 116.2                    | 123.5  | 0.628                |
| Jo1         | 2.3                                   | 1.5        | 1.4      | 0.18                 | 92.1                     | 126.2  | 0.597                |
| Rip P2      | 1.6                                   | 2.5        | 1.9      | 0.08                 | 111.8                    | 76.8   | <b>0.05</b>          |
| U1 RNP-A    | 1.2                                   | 2.7        | 1.4      | <b>0.003</b>         | 377.1                    | 631.8  | <b>0.002</b>         |
| U1 RNP-70   | 2.0                                   | 0.7        | 2.4      | <b>0.005</b>         | 67.9                     | 71.2   | 0.578                |
| RNA pol III | 1.5                                   | 1.6        | 1.6      | 0.77                 | 436.1                    | 427.1  | 0.776                |
| Scl70       | 1.5                                   | 1.3        | 0.8      | 0.74                 | 197.7                    | 194.4  | 0.439                |
| SmD         | 1.4                                   | 1.0        | 1.9      | 0.43                 | 404.0                    | 413.0  | 0.762                |
| PCNA        | 0.8                                   | 1.7        | 1.6      | 0.41                 | 196.5                    | 241.6  | 0.317                |
| SmBB        | 0.5                                   | 1.0        | 1.6      | 0.13                 | 223.6                    | 185.2  | 0.221                |

<sup>a</sup> Bold figures indicate significantly higher antibody frequencies than in controls. P-values show differences in <sup>b</sup> antibody frequencies and <sup>c</sup> antibody levels, between anti-CCP2-positive and anti-CCP2-negative RA.
