# Supplementary material for: Presence of autoantibodies in “seronegative” rheumatoid arthritis associates with classical risk factors and high disease activity
Source: PubMed Central journal article supplement (PMC7364538; doi:10.1186/s13075-020-02191-2), 2020-07-16
Supplement: 13075_2020_2191_MOESM6_ESM.pdf [file 13075_2020_2191_MOESM6_ESM.pdf]

**Supplementary Table 5** Associations between different autoantibodies and PTPN22

polymorphism, in anti-CCP2-negative RA

| <b>Subgroup</b> | <b>Exposure</b> |                | <b>OR (95% CI)<sup>a</sup></b> | <b>OR (95% CI)<sup>b</sup></b> |
|-----------------|-----------------|----------------|--------------------------------|--------------------------------|
|                 | <i>PTPN22-</i>  | <i>PTPN22+</i> |                                |                                |
| Controls        | 2202            | 595            | 1.0 (ref)                      | 1.0 (ref)                      |
| ACPA-           | 370             | 141            | <b>1.43</b> (1.15-1.77)        | <b>1.42</b> (1.15-1.76)        |
| ACPA+           | 221             | 81             | <b>1.36</b> (1.04-1.79)        | <b>1.38</b> (1.05-1.80)        |
| RF-             | 406             | 145            | <b>1.33</b> (1.08-1.65)        | <b>1.34</b> (1.08-1.65)        |
| RF+             | 185             | 77             | <b>1.55</b> (1.17-2.06)        | <b>1.55</b> (1.17-2.06)        |
| other Ab-       | 404             | 154            | <b>1.42</b> (1.16-1.75)        | <b>1.43</b> (1.16-1.76)        |
| other Ab+       | 187             | 68             | <b>1.35</b> (1.01-1.81)        | <b>1.34</b> (1.00-1.80)        |
| any Ab-         | 176             | 71             | <b>1.51</b> (1.13-2.02)        | <b>1.51</b> (1.13-2.02)        |
| any Ab+         | 410             | 148            | <b>1.36</b> (1.10-1.67)        | <b>1.36</b> (1.10-1.68)        |

Odds ratios were adjusted for <sup>a</sup> age, gender, residential area, and <sup>b</sup> SE and smoking. ACPA = any ACPA fine-specificity; RF = IgM and/or IgG and/or IgA RF; other Ab = any other autoantibody; any Ab = ACPA and/or RF and/or other autoantibody.
