# Supplementary material for: Presence of autoantibodies in “seronegative” rheumatoid arthritis associates with classical risk factors and high disease activity
Source: Springer Nature journal article supplement (doi:10.1186/s13075-020-02191-2), 2020-07-16
Supplement: MOESM4 [file 18189976]

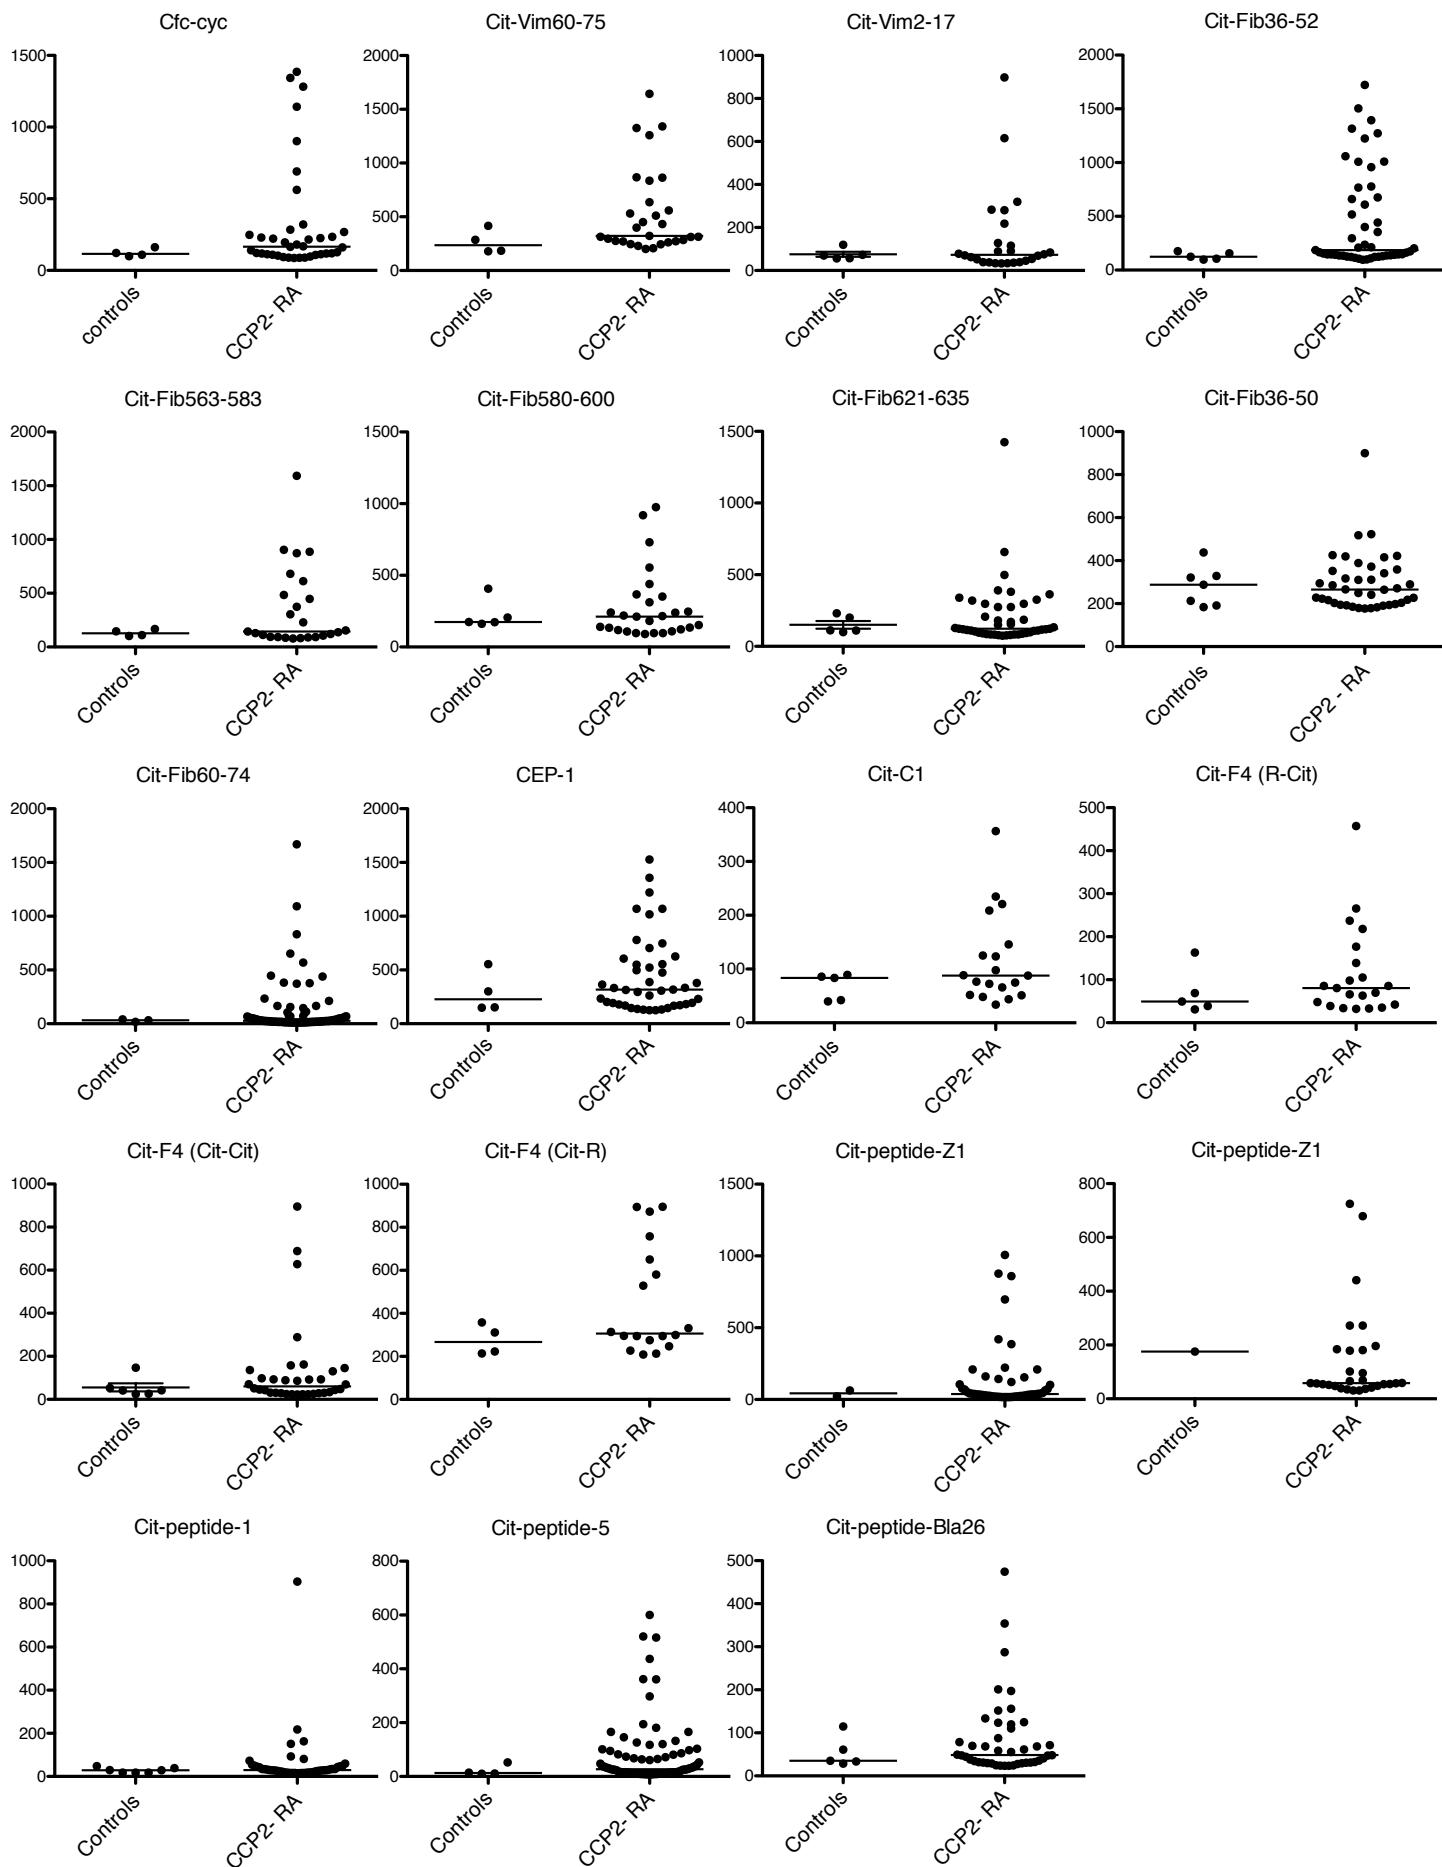

**Supplementary figure 1** ACPA fine-specificity levels in anti-CCP2-negative RA and controls.

ACPA levels for nineteen individual ACPA fine-specificities are shown in separate graphs with AU (arbitrary units) values on the Y-axes. Only ACPA levels above cutoff for positivity are shown. Horizontal lines indicate median for the group (n = 1 - 7 controls and n = 19 - 92 anti-CCP2-negative RA patients). Differences in ACPA levels between ACPA-positive anti-CCP2-negative RA patients and controls did not reach statistical significance.
