# Supplementary material for: Presence of autoantibodies in “seronegative” rheumatoid arthritis associates with classical risk factors and high disease activity
Source: Springer Nature journal article supplement (doi:10.1186/s13075-020-02191-2), 2020-07-16
Supplement: MOESM7 [file 18189976]

**Supplementary table 6** Associations between different ACPA fine-specificities and HLA-DRB1 SE, in anti-CCP2-positive and anti-CCP2-negative RA

| Subgroup                    |     | OR (95% CI) <sup>a</sup> |                       | P-value <sup>b</sup> |
|-----------------------------|-----|--------------------------|-----------------------|----------------------|
|                             |     | CCP2-                    | CCP2+                 |                      |
| Cit-Fib $\beta_{60-74}$     | neg | 1.0 (0.8-1.2)            | <b>3.8</b> (2.5-4.6)  | <b>0.0007</b>        |
|                             | pos | <b>2.2</b> (1.4-3.7)     | <b>6.0</b> (5.0-7.2)  |                      |
| Cit-Peptide-5               | neg | 1.0 (0.9-1.2)            | <b>4.0</b> (3.0-5.4)  | <b>0.04</b>          |
|                             | pos | 1.5 (0.9-2.4)            | <b>5.8</b> (4.8-7.0)  |                      |
| Cit-Peptide-Z1              | neg | 1.0 (0.9-1.2)            | <b>3.3</b> (2.6-4.2)  | <b>&lt;0.0001</b>    |
|                             | pos | 1.5 (0.8-2.8)            | <b>7.0</b> (5.5-8.4)  |                      |
| Cit-Fib $\beta_{36-52}$     | neg | 1.0 (0.9-1.3)            | <b>5.8</b> (4.4-7.7)  | 0.4                  |
|                             | pos | 1.0 (0.5-1.9)            | <b>5.1</b> (4.2-6.2)  |                      |
| Cit-Vim $_{60-75}$          | neg | 1.0 (0.9-1.2)            | <b>3.1</b> (2.5-3.9)  | <b>&lt;0.0001</b>    |
|                             | pos | <b>2.8</b> (1.1-7.0)     | <b>7.9</b> (6.3-10.0) |                      |
| CEP-1                       | neg | 1.0 (0.9-1.2)            | <b>3.4</b> (2.7-4.2)  | <b>&lt;0.0001</b>    |
|                             | pos | 1.8 (0.9-3.7)            | <b>7.7</b> (6.1-9.7)  |                      |
| cfc1-cyc                    | neg | 1.1 (0.9-1.3)            | <b>5.9</b> (4.6-7.7)  | 0.2                  |
|                             | pos | 0.9 (0.4-2.1)            | <b>5.0</b> (4.1-6.1)  |                      |
| Cit-Fib $\alpha_{563-583}$  | neg | 1.1 (0.9-1.2)            | <b>4.5</b> (3.5-5.6)  | 0.06                 |
|                             | pos | 1.3 (0.5-3.3)            | <b>6.0</b> (4.9-7.5)  |                      |
| Cit-Peptide-Z2              | neg | 1.1 (0.9-1.2)            | <b>4.7</b> (3.8-5.9)  | 0.2                  |
|                             | pos | 1.5 (0.6-3.4)            | <b>5.9</b> (4.7-7.5)  |                      |
| Cit-Peptide-1               | neg | 1.1 (0.9-1.2)            | <b>4.7</b> (3.9-5.8)  | 0.07                 |
|                             | pos | 1.3 (0.7-2.4)            | <b>6.1</b> (4.8-7.8)  |                      |
| Cit-Fib $\alpha_{621-635}$  | neg | 1.0 (0.9-1.2)            | <b>4.9</b> (4.0-6.0)  | 0.3                  |
|                             | pos | 1.5 (0.8-2.9)            | <b>5.9</b> (4.6-7.5)  |                      |
| Cit-Peptide-Bla26           | neg | 1.1 (0.9-1.3)            | <b>4.7</b> (3.9-5.8)  | 0.1                  |
|                             | pos | 0.6 (0.3-1.2)            | <b>6.3</b> (4.9-8.2)  |                      |
| Cit-Vim $_{2-17}$           | neg | 1.1 (0.9-1.2)            | <b>4.4</b> (3.6-5.4)  | <b>0.007</b>         |
|                             | pos | 1.3 (0.6-3.1)            | <b>7.1</b> (5.4-9.2)  |                      |
| Cit-F4 <sub>(Cit-Cit)</sub> | neg | 1.0 (0.9-1.3)            | <b>5.7</b> (4.6-7.0)  | 0.2                  |
|                             | pos | 0.8 (0.4-1.7)            | <b>4.8</b> (3.7-6.1)  |                      |
| Cit-F4 <sub>(R-Cit)</sub>   | neg | 1.1 (0.9-1.2)            | <b>5.2</b> (4.3-6.3)  | 0.8                  |
|                             | pos | 1.3 (0.5-3.7)            | <b>5.6</b> (4.2-7.4)  |                      |
| Cit-Fib $\alpha_{580-600}$  | neg | 1.1 (0.9-1.2)            | <b>4.8</b> (4.0-5.8)  | 0.06                 |
|                             | pos | 1.4 (0.6-3.3)            | <b>7.2</b> (5.1-10.1) |                      |
| Cit-Fib $\alpha_{36-50}$    | neg | 1.1 (0.9-1.3)            | <b>5.5</b> (4.6-6.7)  | 0.2                  |
|                             | pos | 0.9 (0.4-1.9)            | <b>4.4</b> (3.1-6.1)  |                      |
| Cit-C1                      | neg | 1.1 (0.9-1.2)            | <b>5.2</b> (4.4-6.2)  | 0.6                  |
|                             | pos | 2.2 (0.7-7.2)            | <b>5.9</b> (3.7-9.3)  |                      |
| Cit-F4 <sub>(Cit-R)</sub>   | neg | 1.1 (0.9-1.2)            | <b>5.8</b> (4.9-6.9)  | <b>&lt;0.0001</b>    |
|                             | pos | 2.3 (0.8-6.5)            | <b>2.1</b> (1.4-3.4)  |                      |

<sup>a</sup> Odds ratios (OR) were adjusted for age, gender and residential area. Significant ORs are shown in bold. <sup>b</sup> P-values indicate differences in ORs between ACPA fine-specificity-positive and -negative subsets, in anti-CCP2-positive RA.
