# Supplementary material for: Presence of autoantibodies in “seronegative” rheumatoid arthritis associates with classical risk factors and high disease activity
Source: Springer Nature journal article supplement (doi:10.1186/s13075-020-02191-2), 2020-07-16
Supplement: MOESM8 [file 18189976]

**Supplementary table 7** Associations between RF isotypes and smoking, in anti-CCP2-positive and anti-CCP2-negative RA

| Subgroup     | Exposure |              | OR (95% CI) <sup>a</sup> | P-value <sup>b</sup> |
|--------------|----------|--------------|--------------------------|----------------------|
|              | CCP2+    | Never smoker |                          |                      |
| Controls     | 1280     | 1589         | 1.0 (ref)                |                      |
| RF IgM-      | 39       | 86           | <b>1.8</b> (1.2-2.6)     | 0.3                  |
| RF IgM+      | 339      | 920          | <b>2.2</b> (1.8-2.5)     |                      |
| RF IgG-      | 115      | 200          | <b>1.4</b> (1.1-1.9)     | <b>&lt;0.0001</b>    |
| RF IgG+      | 263      | 806          | <b>2.4</b> (2.0-2.8)     |                      |
| RF IgA-      | 218      | 360          | <b>1.4</b> (1.1-1.7)     | <b>&lt;0.0001</b>    |
| RF IgA+      | 160      | 646          | <b>3.1</b> (2.5-3.8)     |                      |
| <b>CCP2-</b> |          |              |                          |                      |
| Controls     | 1208     | 1589         | 1.0 (ref)                |                      |
| RF IgM-      | 247      | 359          | 1.1 (0.9-1.3)            | <b>0.002</b>         |
| RF IgM+      | 57       | 142          | <b>1.9</b> (1.4-2.7)     |                      |
| RF IgG-      | 258      | 400          | <b>1.2</b> (1.0-1.4)     | 0.07                 |
| RF IgG+      | 46       | 101          | <b>1.7</b> (1.2-2.4)     |                      |
| RF IgA-      | 281      | 435          | <b>1.2</b> (1.0-1.4)     | <b>0.01</b>          |
| RF IgA+      | 23       | 66           | <b>2.2</b> (1.4-3.6)     |                      |

<sup>a</sup> Odds ratios (OR) were adjusted for age, gender, residential area, SE and PTPN22.

Significant ORs are shown in bold. <sup>b</sup> P-values indicate differences in ORs between RF isotype-positive and -negative RA subsets.
