# Supplementary material for: Presence of autoantibodies in “seronegative” rheumatoid arthritis associates with classical risk factors and high disease activity
Source: Arthritis Res Ther. 2020 Jul 16;22:170. doi: 10.1186/s13075-020-02191-2 (PMC7364538; doi:10.1186/s13075-020-02191-2)
Supplement: Supplementary file 2 — Additional file 2: Supplementary Table 2. Other (non-citrullinated) autoantigens on the multiplex microarray. The table lists the other antigens used on the multiplex microarray, including name, protein of origin, and major associated disease(s). [file 13075_2020_2191_MOESM2_ESM.pdf]

**Supplementary table 2** Other (non-citrullinated) autoantigens on the multiplex microarray

| Antigen     | Protein of origin                                         | Major associated disease(s)                               |
|-------------|-----------------------------------------------------------|-----------------------------------------------------------|
| Ro60/SSA    | RNA associated protein SS-A/Ro (60kD)                     | SLE, Sjögren's syndrome                                   |
| Ro52/SSA    | RNA associated protein SS-A/Ro (52kD)                     | SLE, Sjögren's syndrome                                   |
| La/SSB      | RNA associated protein SS-B/La                            | SLE, Sjögren's syndrome                                   |
| U1 RNP-70   | U1 RNP complex<br>(small nuclear ribonucleoprotein, 70kD) | MCTD, SLE                                                 |
| U1 RNP-A    | U1 RNP complex<br>(small nuclear ribonucleoprotein A)     | MCTD, SLE                                                 |
| U1 RNP-C    | U1 RNP complex<br>(small nuclear ribonucleoprotein C)     | MCTD, SLE                                                 |
| SmD         | U1 RNP complex (SmD peptide)                              | SLE                                                       |
| SmBB        | U1 RNP complex (SmBB protein)                             | SLE                                                       |
| dsDNA       | Double stranded DNA                                       | SLE                                                       |
| PCNA        | Proliferating cell nuclear antigen                        | SLE                                                       |
| Rip P2      | Ribosomal protein P2                                      | SLE                                                       |
| Scl70       | Topoisomerase-1 (Scl protein, 70kD)                       | Systemic sclerosis                                        |
| CENP B      | Centromere protein B                                      | Limited scleroderma (CREST syndrome)                      |
| PMScl100    | Exosome (PM-Scl protein, 100kD)                           | Polymyositis/<br>scleroderma overlap syndrome             |
| RNA pol III | RNA polymerase III                                        | Systemic sclerosis                                        |
| Fibrillarin | Fibrillarin                                               | Systemic sclerosis                                        |
| Jo 1        | Histidyl-tRNA synthetase                                  | Polymyositis/dermatomyositis,<br>anti-synthetase syndrome |

CREST = calcinosis, Raynaud phenomenon, esophageal dysmotility, sclerodactyly, and telangiectasia;

MCTD = mixed connective tissue disease; PM-Scl = polymyositis-scleroderma antigen; SLE = systemic lupus erythematosus; Scl = scleroderma antigen; Sm = Smith antigen; SSA = Sjögren's syndrome type

A antigen; SSB = Sjögren's syndrome type B antigen
